# Supplementary material
Source: publisher figshare collection journal article supplement (https://geolsoc.figshare.com/ndownloader/files/25716607)
Supplement: Supplementary file 1 [file 25716607]

## Sheet: S1 - ol
Supplemental Table 1. Olivine chemistry from electron microbeam analysis.
Sample	SB01 ol rim 1	SB01 ol core 1	SB01 ol rim 2	SB01 ol core 2	SB01 ol rim 3	SB01 ol core 3	SB01 ol rim 4	SB01 ol core 4	SB03 ol rim 1	SB03 ol core 1	SB03 ol rim 2	SB03 ol core 2	SB03 ol rim 3	SB03 ol core 3	SB03 ol rim 4	SB03 ol core 4	SB08 ol rim 1	SB08 ol core 1	SB08 ol rim 2	SB08 ol core 2	SB08 ol rim 3	SB08 ol core 3	SB08 ol rim 4	SB08 ol core 4	SB10 ol rim 1	SB10 ol core 1	SB10 ol rim 2	SB10 ol core 2	SB10 ol rim 3	SB10 ol core 3	ME03 ol core 1	ME03 ol rim 2	ME03 ol core 2	ME03 ol rim 3	ME03 ol core 3	ME03 ol rim 4	ME03 ol core 4	ME04 ol rim 1	ME04 ol core 1	ME04 ol rim 2	ME04 ol core 2	ME04 ol rim 3	ME04 ol core 3	ME05 ol rim 1	ME05 ol core 1	ME05 ol rim 2	ME05 ol core 2	ME05 ol rim 3	ME05 ol core 3
Location (1)	SB	SB	SB	SB	SB	SB	SB	SB	SB	SB	SB	SB	SB	SB	SB	SB	SB	SB	SB	SB	SB	SB	SB	SB	SB	SB	SB	SB	SB	SB	ME	ME	ME	ME	ME	ME	ME	ME	ME	ME	ME	ME	ME	ME	ME	ME	ME	ME	ME
Rock type	tholeiite	tholeiite	tholeiite	tholeiite	tholeiite	tholeiite	tholeiite	tholeiite	hawaiite	hawaiite	hawaiite	hawaiite	hawaiite	hawaiite	hawaiite	hawaiite	hawaiite	hawaiite	hawaiite	hawaiite	hawaiite	hawaiite	hawaiite	hawaiite	hawaiite	hawaiite	hawaiite	hawaiite	hawaiite	hawaiite	mugearite	mugearite	mugearite	mugearite	mugearite	mugearite	mugearite	hawaiite	hawaiite	hawaiite	hawaiite	hawaiite	hawaiite	hawaiite	hawaiite	hawaiite	hawaiite	hawaiite	hawaiite
Analysis	rim	core	rim	core	rim	core	rim	core	rim	core	rim	core	rim	core	rim	core	rim	core	rim	core	rim	core	rim	core	rim	core	rim	core	rim	core	core	rim	core	rim	core	rim	core	rim	core	rim	core	rim	core	rim	core	rim	core	rim	core
SiO2	39.3841	39.9676	40.0479	40.2529	40.5345	40.613	39.2771	39.6314	37.179	38.9023	38.6331	39.6347	37.0978	39.81	36.1259	39.3616	39.7003	39.8326	37.3457	40.3392	39.0378	39.5808	39.0521	39.8933	38.8174	39.7722	38.2397	39.5072	37.8245	39.7247	38.2575	37.7345	38.184	38.5287	38.4847	38.0871	38.8182	40.0741	40.6473	40.2543	40.6046	39.4644	39.9811	39.4623	39.5217	39.284	39.8664	39.4588	39.8276
TiO2	0.0106	0.0104	0.005	0.0034	0.0047	0.0134	0.0198	0.0164	0.0734	0.0144	0.0161	0.0107	0.0623	0.0112	0.049	0.0052	0.0084	0.0074	0.0319	0.005	0.0111	0.0059	0.0237	-0.0004	0.0122	0.0105	0.0272	0.0022	0.0315	0.016	0.031	0.0225	0.0127	0.037	0.03	0.0118	0.0328	0.0247	0.0084	0.0234	-0.0045	0.031	0.0145	0.0318	0.0122	0.0182	0.0179	0.0179	0.0161
Al2O3	0.0437	0.0393	0.0515	0.0585	0.0591	0.0484	0.0281	0.0586	0.0234	0.0386	0.0291	0.0167	0.0241	0.0307	0.016	0.0199	0.0173	0.0353	0.0132	0.027	0.0152	0.0117	0.0095	0.0415	0.0296	0.0114	0.0268	0.037	0.0285	0.0157	0.026	0.0074	0.0257	0.0037	0.0291	0.0235	0.0073	0.0228	0.0492	0.0387	0.0421	0.0083	0.0209	0.0177	-0.0076	0.0161	0.0121	0.0398	0.019
Cr2O3	0.0413	0.0561	0.0308	0.0341	0.0256	0.026	0.0209	0.0461	-0.0239	0.0127	0.017	0.0127	-0.0134	0.0123	-0.0092	0.0167	0.0264	-0.0149	0.0059	0.0302	0.0131	0.015	0.0412	0.0403	0.0134	0.0269	0.0203	0.0291	0.0095	0.0067	0.016	-0.0074	-0.007	-0.0138	0.0088	0.0008	0.0035	0.0447	0.046	0.0444	0.0185	0.0076	0.033	-0.0025	0.0242	0.0322	0.0177	0.0239	0.0407
FeO	17.5425	15.9267	15.8281	14.4639	15.5771	14.2215	18.0984	14.9956	27.1551	18.1501	21.8083	18.0188	31.9865	17.4688	34.8362	17.2084	17.7118	17.314	31.266	17.2949	20.2332	16.8262	20.5402	17.0415	20.7133	16.3188	23.5667	17.323	26.3824	17.758	23.5685	25.0735	22.9546	23.1148	22.3892	24.319	22.2743	19.9904	15.6061	17.3859	14.9363	20.4725	16.2544	19.5523	18.4154	19.0609	18.6982	19.0747	17.7067
MnO	0.2447	0.2351	0.1905	0.1602	0.1679	0.2248	0.3	0.1933	0.4614	0.2929	0.3115	0.2702	0.4999	0.3008	0.573	0.2523	0.2585	0.2676	0.5887	0.3206	0.3494	0.2834	0.3041	0.2631	0.3366	0.1943	0.3564	0.2705	0.4152	0.2263	0.397	0.373	0.3489	0.4236	0.3728	0.3219	0.3348	0.3048	0.3117	0.2173	0.2248	0.3158	0.2693	0.291	0.3067	0.2615	0.2863	0.2659	0.1904
MgO	42.1984	43.4897	43.8553	44.6233	43.5511	45.1719	41.8662	44.4889	34.2762	41.5027	38.328	41.5848	30.7638	42.4009	28.0121	42.2825	42.131	42.9169	31.1349	42.8195	39.7968	42.547	40.0308	42.9769	39.5887	43.4903	37.4822	42.7654	34.8061	42.3045	37.442	36.0936	37.8671	37.948	38.3836	37.0697	38.631	40.785	44.2842	43.0526	44.6335	40.0041	43.4133	40.9392	42.019	40.9726	41.6188	40.5071	42.4333
CaO	0.2766	0.2314	0.2251	0.2246	0.2346	0.2321	0.2491	0.2231	0.4131	0.2869	0.3833	0.2763	0.4537	0.2551	0.4617	0.2528	0.2888	0.2538	0.3555	0.271	0.3034	0.2707	0.3179	0.2516	0.3729	0.2556	0.393	0.2498	0.4104	0.2617	0.2824	0.2828	0.2699	0.2773	0.2633	0.2863	0.2782	0.2721	0.2359	0.2546	0.2074	0.3045	0.2452	0.3275	0.2542	0.3013	0.2842	0.2887	0.2572
Na2O	-0.0041	-0.0078	-0.0116	0.0105	0.0227	0.004	-0.0336	-0.0184	0.0303	0.0105	0.0243	0.0061	0.0093	0.0218	0.0159	-0.018	-0.0072	-0.0156	0.013	0.0068	0.0222	-0.0064	-0.0126	0.0137	0.0275	0.011	0.007	0.0006	0.0174	-0.0035	-0.0038	-0.0103	-0.0047	-0.0033	-0.0044	0.001	0.0199	-0.0043	0.0116	0.0059	0.0144	0.0074	0.0157	0.0254	-0.0003	0.0334	0.0129	-0.0098	-0.02
NiO	0.1638	0.1753	0.1912	0.2341	0.1783	0.2543	0.1351	0.2342	0.0197	0.0709	0.0701	0.1014	0.0291	0.1202	0.0098	0.0787	0.074	0.0825	0.0276	0.0719	0.0713	0.0947	0.0732	0.1156	0.0637	0.1535	0.0353	0.086	0.0342	0.0939	0.0445	0.0439	0.0868	0.0833	0.0521	0.0675	0.0536	0.0722	0.203	0.1877	0.2142	0.0948	0.193	0.1232	0.1161	0.1212	0.1307	0.1163	0.1597
Total	99.9017	100.124	100.414	100.066	100.356	100.809	99.9612	99.8693	99.6077	99.282	99.6207	99.9323	100.913	100.432	100.09	99.4599	100.209	100.68	100.782	101.186	99.8534	99.6289	100.38	100.637	99.9753	100.245	100.155	100.271	99.9597	100.404	100.061	99.6134	99.738	100.399	100.009	100.189	100.454	101.587	101.403	101.465	100.891	100.71	100.44	100.768	100.662	100.101	100.945	99.7834	100.631
(Structural formula on the basis of 4 oxygen)*
Si	1.00505	1.01043	1.00831	1.01183	1.02211	1.01217	1.00358	0.998985	0.996903	1.00114	1.01007	1.01403	1.00551	1.01031	1.00306	1.0066	1.01022	1.00566	1.01088	1.01476	1.01009	1.00937	1.00507	1.00752	1.0048	1.00491	1.0009	1.00177	1.00747	1.00867	1.00247	1.00048	1.00089	1.00415	1.00315	0.999631	1.00693	1.01691	1.01337	1.01031	1.01421	1.01317	1.00923	1.00768	1.00382	1.00808	1.01239	1.01688	1.00917
Ti	0.000203421	0.00019772	9.46681e-05	6.42705e-05	8.91235e-05	0.00025114	0.000380452	0.000310874	0.00148004	0.000278679	0.000316548	0.000205863	0.00126984	0.000213748	0.00102312	0.000100001	0.00016074	0.000140497	0.000649336	9.45856e-05	0.000215982	0.000113146	0.00045869	-7.5969e-06	0.000237483	0.000199506	0.000535383	4.19503e-05	0.000630946	0.000305514	0.000610851	0.000448615	0.000250339	0.000725167	0.00058806	0.000232897	0.00063982	0.000471343	0.000157484	0.000441652	-8.45251e-05	0.00059849	0.000275249	0.000610645	0.000233024	0.000351214	0.000341832	0.000346897	0.00030678
Al	0.00131433	0.00117097	0.00152818	0.0017331	0.00175637	0.00142164	0.000846205	0.0017409	0.000739481	0.00117075	0.00089669	0.000503554	0.000769859	0.000918242	0.000523582	0.000599779	0.00051883	0.00105037	0.000421102	0.000800486	0.000463525	0.000351648	0.000288157	0.00123526	0.000903023	0.000339474	0.000826733	0.00110573	0.000894667	0.000469835	0.000802938	0.000231238	0.000793948	0.000113651	0.000893981	0.000726918	0.000223173	0.000681882	0.00144563	0.00114475	0.00123934	0.000251136	0.000621784	0.000532684	-0.000227504	0.000486924	0.000362143	0.00120883	0.000567401
Cr	0.000833285	0.00112134	0.000613111	0.000677706	0.000510374	0.000512317	0.000422217	0.000918747	-0.000506674	0.000258405	0.000351413	0.000256893	-0.000287157	0.000246799	-0.000201963	0.000337656	0.000531132	-0.000297423	0.000126266	0.000600644	0.000267991	0.000302436	0.000838345	0.000804703	0.000274241	0.00053737	0.000420094	0.000583391	0.00020006	0.000134505	0.000331473	-0.000155124	-0.00014507	-0.000284361	0.000181358	1.66007e-05	7.17806e-05	0.000896813	0.000906712	0.000881052	0.000365342	0.000154264	0.000658607	-5.04727e-05	0.000485971	0.000653298	0.000355376	0.000486968	0.000815362
Fe2+	0.374383	0.336728	0.333271	0.304056	0.328485	0.296409	0.386732	0.316111	0.605923	0.390622	0.476838	0.385528	0.725039	0.370751	0.808902	0.368026	0.376914	0.365567	0.70776	0.363838	0.437819	0.358846	0.44209	0.359931	0.448391	0.344818	0.515857	0.367342	0.587667	0.377086	0.516465	0.555958	0.503187	0.503804	0.488061	0.533781	0.483196	0.424225	0.325377	0.364919	0.311998	0.439543	0.343134	0.417537	0.391162	0.409053	0.397095	0.411094	0.37521
Mn	0.00528917	0.00503426	0.0040625	0.00341083	0.003586	0.00474539	0.00649263	0.00412702	0.010479	0.00638449	0.00689822	0.00585524	0.0114764	0.00646587	0.0134756	0.00546494	0.00557146	0.00572249	0.013497	0.00683099	0.00765742	0.00612142	0.00662906	0.0056281	0.00737992	0.00415819	0.00790129	0.00580957	0.00936708	0.00486699	0.00881109	0.00837656	0.00774623	0.00935099	0.00823079	0.00715597	0.00735588	0.00655118	0.00658201	0.00461943	0.00475592	0.00686709	0.00575784	0.0062939	0.0065981	0.00568378	0.00615809	0.00580405	0.00408633
Mg	1.60536	1.63905	1.64605	1.67218	1.63712	1.67829	1.59472	1.67178	1.37011	1.59223	1.49389	1.58605	1.24305	1.60416	1.15948	1.61195	1.59821	1.61529	1.25636	1.60577	1.53508	1.6175	1.53586	1.61808	1.52768	1.63812	1.46254	1.61656	1.38205	1.60135	1.46258	1.42662	1.4797	1.47439	1.49154	1.4504	1.49385	1.54287	1.64586	1.61084	1.66197	1.53104	1.63369	1.55844	1.59101	1.56741	1.57557	1.55621	1.60286
Ca	0.00756272	0.00626785	0.0060722	0.00604894	0.0063381	0.00619759	0.00681938	0.00602527	0.0118677	0.0079106	0.0107372	0.00757377	0.0131754	0.00693635	0.0137349	0.00692655	0.00787368	0.00686535	0.0103099	0.00730401	0.00841099	0.00739626	0.00876593	0.00680807	0.0103419	0.00691933	0.0110211	0.00678643	0.0117119	0.00711953	0.00792822	0.00803356	0.00757991	0.00774325	0.0073534	0.00805083	0.00773176	0.00739784	0.00630117	0.00684635	0.00555033	0.00837567	0.00663156	0.00896004	0.00691755	0.00828393	0.00773252	0.00797134	0.00698247
(End member)
Fo	80.5663	82.4854	82.7387	84.2113	82.87	84.5213	79.9454	83.6709	68.4583	79.7253	75.1316	79.9015	62.3788	80.6794	58.102	80.9062	80.3698	81.0301	63.1995	80.9465	77.1797	81.287	77.0494	81.2923	76.6218	82.1518	73.2252	80.9698	69.422	80.4527	73.2835	71.3672	74.0512	73.8936	74.7569	72.5423	74.9875	77.8816	82.9517	81.0597	83.757	77.0984	82.1274	78.2651	79.7224	78.7473	79.3116	78.5536	80.5806
Sample numbers are abbreviated to only include the location - SB: Sheridan Bluff. ME: Mount Early - and the number in sequence (01, 02, 03, etc.). The number for the year collected ("15" for 2015) has been omitted.
(1) SB: Sheridan Bluff. ME: Mount Early.
Fo: forsterite.
*Structural formula of elements and end member calculations from Mineral Formulae Recalculation.
John Brady, Smith College and Dexter Perkins, University of North Dakota
https://serc.carleton.edu/research_education/equilibria/mineralformulaerecalculation.html
[truncated: 8 more columns]

## Sheet: S2 - cpx
Supplemental Table 2: Clinopyroxene chemistry from electron microbeam analysis.
Sample	SB01 px rim 1	SB01 px core 1	SB01 px rim 2	SB01 px core 2	SB01 px rim 3	SB01 px core 3	SB01 px rim 4	SB01 px core 4	SB03 px rim 1	SB03 px core 1	SB03 px rim 2	SB03 px core 2	SB08 px rim 1	SB08 px core 1	SB08 px rim 2	SB08 px core 2	SB08 px rim 3	SB08 px core 3	ME03 px rim 1	ME03 px core 1	ME04 px rim 1	ME04 px core 1
Location (1)	SB	SB	SB	SB	SB	SB	SB	SB	SB	SB	SB	SB	SB	SB	SB	SB	SB	SB	ME	ME	ME	ME
Rock type	tholeiite	tholeiite	tholeiite	tholeiite	tholeiite	tholeiite	tholeiite	tholeiite	hawaiite	hawaiite	hawaiite	hawaiite	hawaiite	hawaiite	hawaiite	hawaiite	hawaiite	hawaiite	mugearite	mugearite	hawaiite	hawaiite
Analysis	rim	core	rim	core	rim	core	rim	core	rim	core	rim	core	rim	core	rim	core	rim	core	rim	core	rim	core
SiO2	48.7608	48.9857	48.9194	48.8699	48.6857	48.4552	48.8244	48.0305	44.6784	50.2835	44.3025	50.3595	48.0517	51.2608	50.9198	50.9461	51.0806	51.0592	49.0677	49.3634	43.6157	45.0092
TiO2	2.4035	2.1307	2.235	2.235	2.1342	2.4402	2.0888	2.4224	4.6939	2.0851	5.542	1.9625	2.3632	1.3563	1.7555	1.6652	1.7205	1.017	1.6454	1.7346	4.7582	3.9986
Al2O3	2.802	2.7926	2.7937	2.9961	2.6349	2.8081	2.4653	2.9525	6.6817	2.6679	6.6649	2.5236	5.0949	2.9571	2.6612	2.6311	3.0774	4.5561	4.9499	4.2484	7.0146	4.8446
Cr2O3	0.0108	0.0155	-0.0037	0.1199	0.0095	0.0281	0.0406	0.058	0.0184	0.0267	0.0075	0.0038	0.4853	0.3909	0.0552	0.0163	0.0568	0.6183	0.0289	0.1049	-0.0061	0.0154
FeO	12.4857	12.8628	13.1571	12.192	13.7931	12.0677	12.1872	12.129	10.0067	9.432	11.8876	9.3913	7.1058	6.3755	7.8732	8.032	7.8402	5.5702	7.975	7.2431	12.0609	12.8635
MnO	0.1979	0.2732	0.2775	0.2735	0.2402	0.2611	0.3025	0.3182	0.2179	0.2	0.2707	0.2027	0.1356	0.1	0.1711	0.1634	0.1526	0.1287	0.1225	0.1636	0.1987	0.2554
MgO	11.3508	11.0843	10.9533	11.7969	10.4273	11.5367	11.6236	11.5318	10.4638	13.0715	9.5169	12.8304	13.156	14.5373	13.5503	13.7065	13.846	15.0929	13.4638	13.6234	9.6893	9.39
CaO	20.2604	20.2555	20.1465	19.893	20.0018	20.1607	20.2221	19.8987	21.2541	21.1879	20.831	21.308	21.9046	22.0995	21.9609	21.8263	21.9587	21.3002	21.074	21.812	20.3803	20.7003
Na2O	0.4947	0.563	0.5656	0.4533	0.5355	0.5186	0.4889	0.5156	0.7368	0.4894	0.9698	0.4918	0.4797	0.4269	0.5144	0.4558	0.4472	0.5666	0.7119	0.5484	0.7161	0.8129
NiO	0.0184	0.0101	0.0081	0.0123	-0.0008	0.0275	0.0032	-0.0235	-0.0223	0.0071	0.01	0.0153	-0.0151	0.0025	-0.0068	-0.0022	0.0076	0.0078	0.0227	0.0233	-0.0137	-0.008
Total	98.785	98.9735	99.0524	98.8419	98.4614	98.3038	98.2465	97.8332	98.7293	99.4511	100.003	99.0887	98.7617	99.5068	99.455	99.4406	100.188	99.9171	99.0619	98.865	98.4141	97.882
Mg#	61.8556	60.5844	59.7568	63.3164	57.4165	63.0358	62.981	62.9076	65.101	71.2055	58.8123	70.9113	76.7699	80.2811	75.4405	75.2823	75.9157	82.8752	75.0816	77.0503	58.8967	56.558
(Structural formula on the basis of 6 oxygen)*
Si	1.87404	1.88049	1.87901	1.87271	1.88786	1.86834	1.88287	1.85982	1.71099	1.89373	1.68951	1.90488	1.80839	1.90439	1.90575	1.90685	1.89596	1.87598	1.8349	1.85062	1.68759	1.75706
Ti	0.0694662	0.0615099	0.0645575	0.0644062	0.0622336	0.0707557	0.0605761	0.0705377	0.135178	0.0590527	0.158935	0.0558234	0.0668813	0.037892	0.0494084	0.0468698	0.0480229	0.0280993	0.046271	0.0489026	0.138449	0.117385
Al	0.126921	0.126347	0.126469	0.135314	0.120417	0.12761	0.112049	0.134741	0.301574	0.118418	0.299559	0.112503	0.225983	0.129477	0.117385	0.116064	0.134621	0.197289	0.218157	0.187713	0.319878	0.222894
Cr	0.000328177	0.000470445	-0.000112364	0.00363266	0.000291252	0.000856637	0.0012379	0.00177565	0.000557114	0.000795021	0.000226136	0.000113644	0.0144401	0.0114819	0.00163341	0.000482358	0.00166685	0.0179609	0.000854456	0.0031093	-0.000186608	0.000475314
Fe3	0.0225979	0.0310823	0.0286277	0.0204959	0.0193575	0.0321161	0.0363718	0.0414707	0.0602361	0.0109616	0.0750258	0.00204508	0.0440338	0.00522008	0.00798907	0.0090861	0.00792788	0.016964	0.0702652	0.0499949	0.0819442	0.0892724
Fe2	0.37871	0.381864	0.394006	0.370219	0.42793	0.357015	0.356675	0.351297	0.260241	0.286104	0.3041	0.295031	0.179608	0.19286	0.238437	0.242326	0.235436	0.154187	0.179139	0.177092	0.308322	0.33068
Mn	0.00644229	0.00888318	0.00902811	0.00887713	0.00788911	0.00852722	0.00988087	0.0104362	0.00706795	0.00637981	0.00874394	0.0064942	0.00432244	0.00314671	0.00542395	0.00518017	0.00479748	0.00400514	0.00388006	0.00519495	0.00651192	0.00844484
Mg	0.650345	0.634335	0.627194	0.673916	0.602767	0.66314	0.668241	0.665672	0.597377	0.733882	0.54105	0.723494	0.738102	0.805126	0.756027	0.764788	0.766137	0.826674	0.750572	0.761388	0.55889	0.546461
Ca	0.834285	0.833111	0.829097	0.816747	0.83099	0.832872	0.835541	0.825538	0.872069	0.854944	0.85114	0.863548	0.883236	0.879653	0.880618	0.875274	0.873248	0.838483	0.844347	0.876123	0.844877	0.865803
Na	0.0368636	0.0419042	0.0421216	0.0336792	0.0402602	0.0387699	0.0365553	0.0387092	0.0547075	0.0357358	0.0717071	0.036068	0.0350026	0.0307499	0.0373274	0.0330771	0.0321827	0.0403624	0.0516158	0.0398618	0.0537212	0.0615274
(End members)
Wo	44.2371	44.3052	44.1261	43.4121	44.177	44.1808	44.0494	43.8189	48.721	45.3337	48.0513	45.833	47.8724	46.719	46.765	46.2747	46.3815	45.6614	45.7809	46.9872	47.0937	47.2544
En	34.4839	33.7342	33.3805	35.8203	32.0443	35.1772	35.2294	35.3333	33.3744	38.9143	30.5451	38.3996	40.006	42.7608	40.1486	40.4335	40.6925	45.0183	40.6964	40.8339	31.1527	29.8251
Fs	21.279	21.9606	22.4934	20.7675	23.7787	20.642	20.7212	20.8478	17.9045	15.752	21.4036	15.7674	12.1216	10.5202	13.0864	13.2919	12.926	9.32039	13.5228	12.1789	21.7536	22.9205
Sample numbers are abbreviated to only include the location - SB: Sheridan Bluff. ME: Mount Early - and the number in sequence (01, 02, 03, etc.). The number for the year collected ("15" for 2015) has been omitted.
(1) SB: Sheridan Bluff. ME: Mount Early.
Wo: wollastonite. En: enstatite. Fs: ferrosilite.
*Structural formula of elements and end member calculations from Mineral Formulae Recalculation.
John Brady, Smith College and Dexter Perkins, University of North Dakota
https://serc.carleton.edu/research_education/equilibria/mineralformulaerecalculation.html

## Sheet: S3 - plag
Supplemental Table 3: Plagioclase chemistry from electron microbeam analysis.
Sample	SB01 pl rim 1	SB01 pl core 1	SB01 pl rim 2	SB01 pl core 2	SB01 pl rim 3	SB01 pl core 3	SB01 pl rim 4	SB01 pl core 4	SB03 pl rim 1	SB03 pl mid 1	SB03 pl core 1	SB03 pl rim 2	SB03 pl core 2	SB08 pl rim 1	SB08 pl core 1	SB08 pl rim 2	SB08 pl mid 2	SB08 pl core 2	SB08 pl rim 3	SB08 pl mid 3	SB08 pl core 3	SB10 pl rim 1	SB10 pl mid 1	SB10 pl core 1	SB10 pl rim 2	SB10 pl core 2	ME04 pl rim 1	ME04 pl core 1	ME04 pl rim 2	ME04 pl mid 2	ME04 pl core 2	ME04 pl rim 3	ME04 pl mid 3	ME04 pl core 3	ME04 pl rim 4	ME04 pl core 4	ME05 pl rim 1	ME05 pl core 1	ME05 pl rim 2	ME05 pl core 2	ME11 pl rim 1	ME11 pl core 1	ME11 pl rim 2	ME11 pl core 2	ME11 pl rim 3	ME11 pl core 3
Location (1)	SB	SB	SB	SB	SB	SB	SB	SB	SB	SB	SB	SB	SB	SB	SB	SB	SB	SB	SB	SB	SB	SB	SB	SB	SB	SB	ME	ME	ME	ME	ME	ME	ME	ME	ME	ME	ME	ME	ME	ME	ME	ME	ME	ME	ME	ME
Rock type	tholeiite	tholeiite	tholeiite	tholeiite	tholeiite	tholeiite	tholeiite	tholeiite	hawaiite	hawaiite	hawaiite	hawaiite	hawaiite	hawaiite	hawaiite	hawaiite	hawaiite	hawaiite	hawaiite	hawaiite	hawaiite	hawaiite	hawaiite	hawaiite	hawaiite	hawaiite	hawaiite	hawaiite	hawaiite	hawaiite	hawaiite	hawaiite	hawaiite	hawaiite	hawaiite	hawaiite	hawaiite	hawaiite	hawaiite	hawaiite	mugearite	mugearite	mugearite	mugearite	mugearite	mugearite
Analysis	rim	core	rim	core	rim	core	rim	core	rim	mid	core	rim	core	rim	core	rim	mid	core	rim	mid	core	rim	mid	core	rim	core	rim	core	rim	mid	core	rim	mid	core	rim	core	rim	core	rim	core	rim	core	rim	core	rim	core
SiO2	52.2691	50.8518	51.7674	50.9085	52.4898	50.2895	52.1696	50.8433	52.8696	53.1523	51.0238	54.7681	52.6279	54.6128	50.7554	52.353	51.6657	51.9717	52.0407	50.1275	50.8132	51.1063	51.1946	50.5942	52.9133	50.2942	50.115	50.0542	50.4906	50.1583	50.8451	50.4033	50.6055	49.696	49.4858	50.6786	52.1322	51.6465	51.0547	51.3146	52.7034	50.6078	51.049	52.0784	51.8875	51.1444
TiO2	0.0679	0.0811	0.0576	0.068	0.0947	0.0807	0.094	0.0759	0.1162	0.1058	0.0592	0.1576	0.1065	0.1265	0.0783	0.089	0.0754	0.0615	0.0951	0.039	0.0751	0.0464	0.0736	0.0876	0.1058	0.086	0.0665	0.0772	0.0636	0.0686	0.0665	0.0573	0.0561	0.0684	0.081	0.0632	0.1024	0.0462	0.0657	0.0853	0.1041	0.0696	0.0691	0.0801	0.1315	0.0861
Al2O3	30.1372	30.632	30.3992	30.7998	28.7778	30.4645	29.2113	30.3424	28.6388	28.9994	30.3732	27.7844	29.0416	28.0747	30.4747	29.5378	30.4637	29.8354	29.8652	30.6767	30.0514	31.0305	30.0968	30.413	29.4871	31.0576	30.7646	30.6619	30.4934	30.923	30.2849	30.4699	30.1179	30.6038	30.3991	30.2702	29.3367	29.4909	29.7137	29.6345	28.9552	30.0064	30.0268	28.3246	29.1535	29.4695
FeO	0.4847	0.436	0.6216	0.3994	0.7031	0.3718	0.5297	0.5566	0.5186	0.4299	0.4458	0.5304	0.4743	0.4212	0.2908	0.5218	0.3365	0.4195	0.5269	0.4233	0.3266	0.7011	0.5262	0.4536	0.4532	0.5045	0.4709	0.4828	0.5593	0.6103	0.324	0.5338	0.5834	0.5596	0.5313	0.4731	0.5391	0.4328	0.7169	0.4719	0.6764	0.5755	0.6052	0.6238	0.6844	0.6961
MgO	0.1479	0.1758	0.1384	0.1876	0.1248	0.1146	0.1427	0.1644	0.0853	0.1034	0.1213	0.106	0.086	0.0743	0.1261	0.1111	0.0976	0.1339	0.1039	0.1191	0.0631	0.1243	0.0978	0.1263	0.1056	0.1037	0.1414	0.1676	0.113	0.1116	0.1563	0.142	0.1503	0.1239	0.1162	0.157	0.1412	0.1816	0.1739	0.1447	0.0884	0.0862	0.0933	0.1077	0.0655	0.1025
CaO	12.7184	13.4939	12.7037	13.4196	11.6428	13.5414	12.2207	13.3928	11.4976	11.6206	13.2112	10.067	11.6528	10.2801	13.2561	11.9986	12.8601	12.3736	12.1267	13.3972	13.0439	13.2756	12.8961	13.3138	11.7516	13.609	13.2123	13.2758	13.1939	13.508	12.8902	12.9844	12.8179	13.5875	13.5742	12.8823	11.7537	12.3086	12.8326	12.1558	11.2963	12.6321	12.2905	11.2413	11.5564	11.9153
Na2O	4.2071	3.8173	4.2679	3.8138	4.8691	3.6519	4.5972	4.0888	4.8697	4.7188	3.8181	5.6716	4.7728	5.4665	3.7676	4.3565	3.928	4.141	4.418	3.5876	3.7364	3.718	3.8823	3.8315	4.5509	3.6304	3.5931	3.7497	3.7094	3.4416	3.9118	3.7823	4.0676	3.6347	3.446	3.7706	4.5364	4.1752	4.0489	4.2502	4.851	4.0717	4.1797	4.6915	4.6346	4.3884
K2O	0.1932	0.1169	0.1673	0.14	0.2413	0.1423	0.2069	0.129	0.3872	0.3512	0.2168	0.4876	0.352	0.5	0.2285	0.2877	0.2101	0.2618	0.3082	0.2103	0.2383	0.2359	0.2344	0.2175	0.3024	0.212	0.1932	0.2089	0.1848	0.1806	0.1786	0.1954	0.2169	0.1894	0.1877	0.1761	0.3254	0.2408	0.2367	0.2395	0.3172	0.2353	0.2679	0.3367	0.3375	0.2918
P2O5	0.0271	-0.0122	-0.0095	0.0264	0.0118	0.006	-0.0235	-0.0137	0	-0.0198	0.0207	0.0073	0.0606	-0.0063	-0.0075	-0.002	-0.003	0.022	0.0183	0.0254	0.0125	0.0372	-0.001	0	0.0328	-0.0264	0.0394	0.0277	0.0007	-0.0045	0.013	-0.0255	-0.0017	0.0356	0.0229	-0.0162	0.0276	0.016	0.028	0.025	0.0063	0.0015	0.0255	0.004	0.0158	0.0173
Total	100.245	99.6079	100.109	99.798	99.0708	98.575	99.1614	99.6223	98.9423	99.4648	99.2389	99.5618	99.2216	99.5878	99.0457	99.2912	99.6592	99.2714	99.5298	98.6482	98.4183	100.283	99.036	98.921	99.7335	99.4761	98.707	98.6802	98.8925	99.0134	98.7293	98.5059	98.6059	98.5317	97.8244	98.5004	98.8789	98.5387	98.8351	98.3523	98.9634	98.2771	98.5896	97.4881	98.4868	98.1243
(Structural formula on the basis of 8 oxygen)*
Si	2.36537	2.31856	2.34328	2.31711	2.39521	2.31893	2.37989	2.31423	2.41435	2.41659	2.33605	2.47543	2.39898	2.47023	2.32769	2.38977	2.35408	2.37542	2.36806	2.31094	2.34752	2.31828	2.34881	2.32203	2.40279	2.29793	2.30965	2.30363	2.32145	2.30674	2.33738	2.32319	2.32679	2.29345	2.30296	2.33741	2.38621	2.3765	2.34511	2.36448	2.4068	2.33526	2.34742	2.41611	2.38386	2.3605
Ti	0.00231071	0.0027807	0.0019607	0.00232748	0.00324968	0.00279836	0.00322469	0.00259798	0.00399044	0.00361733	0.00203822	0.00535674	0.00365074	0.00430283	0.00270038	0.0030551	0.00258352	0.00211383	0.00325425	0.00135207	0.00260912	0.00158281	0.00253934	0.00302338	0.00361291	0.00295487	0.00230474	0.00267184	0.00219901	0.00237247	0.00229892	0.0019861	0.00193973	0.0023738	0.00283473	0.00219204	0.00352472	0.00159867	0.00226942	0.00295572	0.00357498	0.00241517	0.00238948	0.00279455	0.00454323	0.00298833
Al	1.60736	1.64605	1.62175	1.65219	1.54769	1.65561	1.57053	1.62772	1.54136	1.55391	1.63891	1.48006	1.56022	1.49663	1.64717	1.58909	1.6359	1.60717	1.60166	1.66678	1.63626	1.65896	1.62742	1.64506	1.57811	1.67241	1.67104	1.66314	1.65238	1.67608	1.64083	1.65521	1.63207	1.66456	1.66734	1.64544	1.5826	1.59934	1.60857	1.60934	1.55842	1.63188	1.62731	1.54874	1.57857	1.603
Fe3	0.0183436	0.0166247	0.0235307	0.0152027	0.0268313	0.0143375	0.0202081	0.0211871	0.0198053	0.0163457	0.0170689	0.0200486	0.0180809	0.0159326	0.011153	0.0199194	0.0049948	0.0160347	0.0200509	0.0163199	0.00610091	0.0265967	0.0201897	0.0174099	0.0172106	0.0192769	0.0181495	0.0185822	0.0215055	0.0115814	0.0124561	0.020576	0.0224327	0.0215974	0.0206777	0.0182481	0.0206362	0.0166548	0.0275387	0.0181844	0.0258322	0.0222085	0.0232734	0.0242025	0.0262956	0.0268678
Fe2	0	0	0	0	0	0	0	0	0	0	0	0	0	0	0	0	0.00782733	0	0	0	0.00651752	0	0	0	0	0	0	0	0	0.0118909	0	0	0	0	0	0	0	0	0	0	0	0	0	0	0	0
Mg	0.0102882	0.0119492	0.00953094	0.0127291	0.0084897	0.011303	0.00970446	0.0111553	0.00738898	0.00700826	0.0102567	0.0078314	0.0058441	0.00501002	0.00862117	0.00756028	0.00662945	0.00912353	0.00704812	0.00818528	0.00434581	0.00840564	0.00668914	0.0131701	0.00714863	0.00706329	0.00971487	0.0125007	0.00774525	0.0076512	0.0107115	0.0111977	0.0106098	0.00852408	0.00884207	0.0107949	0.0102474	0.0124572	0.0133085	0.00993965	0.00736808	0.00628147	0.0070696	0.00744875	0.00448609	0.00705241
Ca	0.616658	0.659185	0.616105	0.654414	0.569226	0.669007	0.5973	0.653133	0.562547	0.566066	0.64805	0.487507	0.569113	0.498193	0.651352	0.586818	0.627799	0.605937	0.591221	0.661736	0.645651	0.645213	0.633926	0.654678	0.571748	0.666198	0.652402	0.654623	0.649949	0.665588	0.63489	0.641218	0.631441	0.671838	0.676828	0.636591	0.576415	0.606824	0.631539	0.600116	0.552708	0.624527	0.605524	0.55877	0.56885	0.589207
Na	0.369134	0.337455	0.374566	0.336558	0.430789	0.326494	0.406611	0.360841	0.431165	0.415968	0.338924	0.497022	0.421823	0.479401	0.335007	0.385567	0.347006	0.366966	0.389782	0.320674	0.334683	0.327	0.345349	0.340944	0.400677	0.321604	0.321067	0.334592	0.330673	0.306877	0.348662	0.33801	0.362613	0.325224	0.310934	0.337184	0.402589	0.372495	0.360589	0.379708	0.429517	0.364284	0.372646	0.422005	0.412835	0.392698
K	0.0111537	0.00679963	0.00966099	0.0081291	0.0140471	0.00837091	0.0120409	0.00749068	0.0225573	0.0203701	0.0126627	0.0281155	0.0204697	0.0288517	0.0133686	0.0167538	0.0122125	0.0152652	0.0178912	0.0123683	0.0140448	0.0136514	0.0137195	0.0127346	0.0175182	0.012357	0.0113591	0.0122651	0.0108395	0.0105958	0.0104742	0.0114897	0.0127226	0.0111508	0.0111437	0.0103616	0.0190011	0.0141355	0.0138703	0.0140786	0.0184796	0.0138515	0.0157158	0.0199279	0.0197811	0.017181
(End members)
An	61.8547	65.6926	61.5901	65.5003	56.1332	66.6427	58.7922	63.9409	55.3542	56.4709	64.8285	48.142	56.2695	49.5002	65.1529	59.3262	63.6057	61.3192	59.1875	66.5209	64.9301	65.4464	63.8398	64.9252	57.7556	66.6092	66.2453	65.3655	65.5546	67.7057	63.8705	64.7226	62.7191	66.6365	67.7569	64.6852	57.7568	61.0822	62.7774	60.3797	55.2319	62.2868	60.9249	55.8378	56.8017	58.9746
Ab	37.0265	33.6298	37.4441	33.6861	42.4816	32.5235	40.0227	35.3258	42.4262	41.497	33.9047	49.0816	41.7066	47.6331	33.5098	38.9801	35.157	37.136	39.0214	32.2357	33.6575	33.1689	34.7786	33.8119	40.4747	32.1553	32.6013	33.4098	33.3521	31.2165	35.0757	34.1177	36.0172	32.2575	31.1275	34.2619	40.3393	37.4949	35.8439	38.2038	42.9214	36.3317	37.4938	42.1709	41.2231	39.3057
Or	1.11879	0.677632	0.965778	0.81364	1.38523	0.833863	1.18518	0.733327	2.21962	2.03213	1.26673	2.77644	2.02389	2.86669	1.33723	1.69378	1.23731	1.5448	1.79111	1.24332	1.41242	1.38472	1.38163	1.26291	1.76962	1.23551	1.15341	1.22469	1.09328	1.07784	1.05372	1.15974	1.2637	1.106	1.11559	1.05286	1.90391	1.42286	1.37876	1.41649	1.84666	1.38148	1.58124	1.99139	1.97521	1.71967
Sample numbers are abbreviated to only include the location - SB: Sheridan Bluff. ME: Mount Early - and the number in sequence (01, 02, 03, etc.). The number for the year collected ("15" for 2015) has been omitted.
(1) SB: Sheridan Bluff. ME: Mount Early.
An: anorthite. Ab: albite. Or: orthoclase.
*Structural formula of elements and end member calculations from Mineral Formulae Recalculation.
John Brady, Smith College and Dexter Perkins, University of North Dakota
https://serc.carleton.edu/research_education/equilibria/mineralformulaerecalculation.html

## Sheet: S4 - TiMt
Supplemental Table 4. Magnetite chemistry from electron microbeam analysis.
Sample	SB01 Mt 1	SB01 Mt 2	SB01 Mt 3	SB03 Mt 1	SB03 Mt 2	SB03 Mt 3 inc 2	SB03 Mt 4 inc 2	SB03 Mt 4	SB03 Mt 5	SB08 Mt 1	SB08 Mt 2	SB10 Mt 1	SB10 Mt 2	ME03 Mt 1	ME03 Mt 2
Location (1)	SB	SB	SB	SB	SB	SB	SB	SB	SB	SB	SB	SB	SB	ME	ME
Rock type	tholeiite	tholeiite	tholeiite	hawaiite	hawaiite	hawaiite	hawaiite	hawaiite	hawaiite	hawaiite	hawaiite	hawaiite	hawaiite	mugearite	mugearite
SiO2	0.0859	0.1584	0.0768	0.0753	0.1907	0.0657	0.2723	0.1411	0.0486	0.0575	0.095	0.1529	0.0114	0.0791	0.0843
TiO2	26.1808	27.2657	24.5032	26.8883	27.2224	27.5612	27.955	27.983	28.1745	25.7181	26.2221	28.3541	27.6063	23.9382	24.4676
Al2O3	1.1945	0.8395	1.3233	2.185	1.2004	2.2849	0.9699	1.1465	1.7895	1.3984	1.508	1.1342	1.2441	1.7381	1.1095
Cr2O3	0.2537	0.349	0.1484	0.0152	-0.0079	-0.0007	0.0202	0.0013	0.0014	0.0209	0.0084	0.089	0.1154	-0.0064	0.0164
FeO	67.8339	66.4971	69.7153	66.9222	67.0649	66.647	67.3623	66.2268	66.0021	68.5342	67.9441	65.8355	66.3347	70.0001	70.66
MnO	0.5858	0.6398	0.5547	0.7472	0.7501	0.7308	0.692	0.7855	0.8115	0.6806	0.7095	0.8004	0.8047	0.6663	0.694
MgO	1.7555	0.9059	1.2	1.6751	1.1237	1.529	0.7923	1.3712	1.4393	1.4578	1.4245	2.2945	1.9208	1.6058	0.8937
CaO	0.1264	0.1345	0.1145	0.0459	0.1951	0.0294	0.0379	0.0685	0.051	0.0348	0.0504	0.0252	0.064	0.089	0.092
V2O3	0.6931	0.6846	0.6456	0.5138	0.1984	0.4049	0.3396	0.3402	0.4155	0.4295	0.3573	0.4092	0.446	0.6056	0.5239
Total	98.7096	97.4745	98.2817	99.0681	97.9378	99.2521	98.4415	98.0643	98.7334	98.3316	98.3193	99.0951	98.5473	98.7158	98.5414
(Structural formula on the basis of 4 oxygen)*
Si	0.0031727	0.00598256	0.00285357	0.00275559	0.00710977	0.00240018	0.0101409	0.00524985	0.00179169	0.00212631	0.0035123	0.00559129	0.000420411	0.00290728	0.0031293
Ti	0.727175	0.774408	0.684652	0.739951	0.763224	0.757178	0.782903	0.782952	0.781092	0.715186	0.729048	0.779724	0.765594	0.661642	0.683017
Al	0.0519969	0.0373688	0.0579483	0.094238	0.0527457	0.0983789	0.0425706	0.0502747	0.0777522	0.0609462	0.065709	0.0488821	0.054073	0.0752907	0.0485403
Cr	0.00740852	0.0104216	0.00435949	0.000439783	-0.000232867	-2.02187e-05	0.000594777	3.82418e-05	4.08065e-05	0.000611056	0.00024554	0.00257318	0.00336473	-0.00018598	0.000481325
Fe3	0.479899	0.391429	0.56268	0.419909	0.406819	0.382485	0.370747	0.373284	0.356439	0.503818	0.468926	0.377915	0.410534	0.595798	0.578687
Fe2	1.61536	1.70892	1.60358	1.62816	1.68419	1.65369	1.72723	1.68739	1.67844	1.61563	1.63183	1.63544	1.63528	1.55582	1.61487
Mn	0.0183261	0.0204674	0.017457	0.0231602	0.023687	0.0226133	0.0218283	0.0247544	0.0253396	0.0213175	0.022218	0.0247912	0.0251356	0.0207427	0.0218205
Mg	0.0966595	0.051006	0.0664686	0.0913836	0.0624545	0.0832713	0.0439871	0.0760553	0.0791016	0.0803648	0.0785125	0.125084	0.105599	0.0879854	0.049456
Sample numbers are abbreviated to only include the location - SB: Sheridan Bluff. ME: Mount Early - and the number in sequence (01, 02, 03, etc.). The number for the year collected ("15" for 2015) has been omitted.
(1) SB: Sheridan Bluff. ME: Mount Early.
*Structural formula of element calculations from Mineral Formulae Recalculation.
John Brady, Smith College and Dexter Perkins, University of North Dakota
https://serc.carleton.edu/research_education/equilibria/mineralformulaerecalculation.html

## Sheet: S5 - ilm
Supplemental Table 5. Ilmenite chemistry from electron microbeam analysis.
Sample	SB01 Il 1	SB01 Il 2	SB01 Il 3	SB03 Il inc 1	SB03 Il 2 inc 1	SB03 Il 3 inc 2	SB08 Il 1	SB08 Il 2	ME03 Il 1
Location (1)	SB	SB	SB	SB	SB	SB	SB	SB	ME
Rock type	tholeiite	tholeiite	tholeiite	hawaiite	hawaiite	hawaiite	hawaiite	hawaiite	mugearite
SiO2	0.0588	0.043	0.0581	0.0998	0.1005	0.0775	0.1792	0.0343	0.2215
TiO2	48.9264	48.4455	48.798	26.3832	27.121	51.2655	50.2706	50.663	49.4237
Al2O3	0.0396	0.0557	0.0942	0.8464	0.7949	0.0369	0.0564	0.048	0.1492
FeO	47.8947	49.0351	47.9939	68.3508	67.3548	45.2473	46.8904	46.1581	46.7221
MnO	0.6682	0.6785	0.6431	0.7844	0.8	0.9539	0.7252	0.7816	0.7903
MgO	0.8012	0.5397	0.8233	0.8276	0.9573	1.5387	1.1024	1.1002	0.6793
CaO	0.1577	0.0582	0.1477	0.0383	0.0602	0.0859	0.1905	0.088	0.0885
Cr2O3	0.0127	-0.0007	-0.0012	0.0312	-0.017	0.0032	0.0157	0.0121	0.0048
V2O3	0.4575	0.4469	0.3864	0.215	0.1997	0.2505	0.3641	0.4155	0.4122
Total	99.0168	99.3017	98.9435	97.5767	97.3714	99.4594	99.7946	99.3007	98.4915
(Structural formula on the basis of 6 oxygen)*
Si	0.00298165	0.00217749	0.00294425	0.00498788	0.00502964	0.00388919	0.00899074	0.00173256	0.0112988
Ti	1.86601	1.84516	1.85991	0.991756	1.02087	1.93497	1.89698	1.92476	1.8962
Nb	0	0	0	0	0	0	0	0	0
Al	0.00236649	0.0033241	0.00562573	0.049853	0.0468828	0.00218229	0.00333478	0.00285736	0.00896927
Fe3	0.25965	0.302005	0.268665	1.95666	1.90133	0.120102	0.184718	0.144153	0.176025
Fe2	1.77116	1.77433	1.76504	0.899827	0.917336	1.77858	1.78246	1.80545	1.81687
Mn	0.0286962	0.0290989	0.0276004	0.0332018	0.0339078	0.0405414	0.0308144	0.0334363	0.034142
Mg	0.0605682	0.0407442	0.0621987	0.0616639	0.071424	0.115116	0.0824559	0.0828497	0.0516588
Ca	0.00856707	0.00315743	0.00801864	0.00205072	0.00322767	0.00461819	0.0102394	0.0047621	0.00483641
Sample numbers are abbreviated to only include the location - SB: Sheridan Bluff. ME: Mount Early - and the number in sequence (01, 02, 03, etc.). The number for the year collected ("15" for 2015) has been omitted.
(1) SB: Sheridan Bluff. ME: Mount Early.
*Structural formula of element calculations from Gabbrosoft.org

## Sheet: S6 - Cr-Sp
Supplementary Table 6. Cr-Spinel chemistry from electron microbeam analysis.
Sample	ME04 Cr 1	ME04 Cr 2	ME04 Cr 3	ME04 Cr 4
Location (1)	ME	ME	ME	ME
Rock type	hawaiite	hawaiite	hawaiite	hawaiite
Cr2O3	21.0101	24.0503	24.4876	24.6877
Al2O3	33.9332	15.2679	16.1593	18.522
TiO2	1.3659	6.1443	5.4613	5.0732
FeO	29.6626	44.1461	43.7897	41.8274
MgO	13.6127	7.5058	8.3574	8.6296
MnO	0.2649	0.3879	0.3527	0.3441
SiO2	0.0865	0.0739	0.0644	0.1337
CaO	-0.0043	0.1688	0.0531	0.0386
V2O3	0.1307	0.3582	0.3301	0.3221
Total	100.062	98.1032	99.0555	99.5785
(Structural formula on the basis of 32 oxygen)*
Cr	3.87434	5.07086	5.06055	5.02483
Al	9.33149	4.80061	4.98001	5.62192
Ti	0.239614	1.23242	1.07367	0.982305
Fe3	2.2312	3.45397	3.58502	3.20923
Fe2	3.6361	6.5906	6.20195	5.96697
Mg	4.73222	2.98338	3.25592	3.31117
Mn	0.0357348	0.0658984	0.0564085	0.0535063
Sample numbers are abbreviated to only include the location - SB: Sheridan Bluff. ME: Mount Early - and the number in sequence (01, 02, 03, etc.). The number for the year collected ("15" for 2015) has been omitted.
(1) SB: Sheridan Bluff. ME: Mount Early
*Structural formula of element calculations from Andy Tindle software.
http://www.open.ac.uk/earth-research/tindle/AGTWebPages/AGTSoft.html
